# Supplementary material
Source: PubMed Central journal article supplement (PMC6913091)
Supplement: NIHMS1047074-supplement-1.pdf [file NIHMS1047074-supplement-1.pdf]

Supplementary Information to  
**Pushing the envelope: LPS modifications and their consequences**  
 Brent W. Simpson and M. Stephen Trent

**Supplementary Information S1. Variations to Kdo-lipid A introduced during the Raetz pathway.** Tabular summary (left) and structural depiction (right) of sites that have variations between organisms or under different growth conditions within an organism.

| Site of variation     | Group in <i>E. coli</i> under standard lab conditions (enzyme) | Alternate group (enzyme, organism)                      |
|-----------------------|----------------------------------------------------------------|---------------------------------------------------------|
| X                     | -O- (GlcNAc synthesis)                                         | -NH- (GnnA/B, <i>Campylobacter/Leigoneilla</i> /etc.)   |
| R1                    | Kdo                                                            | PO <sub>4</sub> (KdkA, <i>Vibrio/Haemophilus</i> /etc.) |
| R2                    | -OH (Kdo synthesis)                                            | NH <sub>2</sub> (KdnA/B, <i>Shewanella</i> )            |
| 2 and 2' primary acyl | 3-OH, C14:0 (LpxD)                                             | 3-OH, C18:0 (LpxD1, <i>Francisella</i> )                |
|                       | 3-OH, C14:0 (LpxD)                                             | 3-OH, C16:0 (LpxD2, <i>Francisella</i> )                |
| R3                    | -H (unmodified)                                                | 3-OH, C12:0 (LpxD1, <i>Leptospira</i> )                 |
|                       |                                                                | 3-OH, C12:0 (LpxD2, <i>Leptospira</i> )                 |
| R4                    | C12:0 (LpxL, 37°C)                                             | 2-OH, C12:0 (LpxL1, <i>Pseudomonas</i> )                |
|                       |                                                                | C12:1 (LpxP, <i>Salmonella/E.coli</i> /etc low temp)    |
|                       |                                                                | C14:0 (LpxL2, <i>Klebsiella</i> )                       |
| R5                    | C14:0 (LpxM)                                                   | -H (unmodified, <i>Francisella</i> /etc.)               |
|                       |                                                                | C12:0 or C14:0 (LpxJ, <i>Helicobacter</i> /etc.)        |
|                       |                                                                | 3-OH, C12:0 (LpxN, <i>Vibrio</i> )                      |

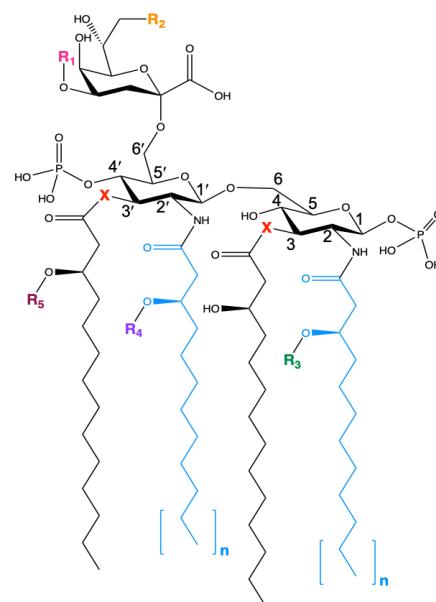

## Supplementary Information S2. Enzymes that modify the Kdo-lipid A domain of LPS

| Enzyme <sup>a</sup>       | Protein localization | Active site topology | Pathogenic organisms <sup>b</sup>                                                                                                                                                                                                                                             | Activity                                                                       | Published structures (PDB ID) | Contributors to regulation                 | Effect of modification                        | References |
|---------------------------|----------------------|----------------------|-------------------------------------------------------------------------------------------------------------------------------------------------------------------------------------------------------------------------------------------------------------------------------|--------------------------------------------------------------------------------|-------------------------------|--------------------------------------------|-----------------------------------------------|------------|
| AlmG                      | Inner membrane       | Cytoplasmic          | <i>Vibrio</i>                                                                                                                                                                                                                                                                 | Glycine transfer to hydroxyl group of 3' acyloxyacyl chain                     |                               | VprAB (CarRS)                              | AMP resistance                                | 1-3        |
| ArnT (PmrK)               | Inner membrane       | Periplasmic          | <i>Bordetella bronchiseptica</i> ,<br><i>Burkholderia</i> ,<br><i>Klebsiella</i> , <i>E. coli</i> ,<br><i>P. mirabilis</i> ,<br><i>Pseudomonas</i> ,<br><i>Salmonella</i> ,<br><i>Shigella</i> , <i>Yersinia</i>                                                              | Aminoarabinose addition, Glucosamine addition (Bordetella)                     | 5EZM, 5F15                    | PmrAB, ParRS, CprRS                        | AMP resistance                                | 4-9        |
| EptA (PmrC, Mcr)          | Inner membrane       | Periplasmic          | <i>Acinetobacter</i> ,<br><i>Capnocytophaga</i> ,<br><i>Cronobacter</i> ,<br><i>E. coli</i> ,<br><i>Haemophilus</i> ,<br><i>Helicobacter</i> ,<br><i>Klebsiella</i> ,<br><i>Neisseria</i> ,<br><i>Pseudomonas</i> ,<br><i>Salmonella</i> ,<br><i>Shigella</i> , <i>Vibrio</i> | Phosphoethanolamine addition                                                   | 4KAV, 4KAY, 5FGN,             | PmrAB, ColRS                               | AMP resistance                                | 7,10-16    |
| EptB                      | Inner membrane       | Periplasmic          | <i>E. coli</i> , <i>Salmonella</i> ,<br><i>Yersinia</i>                                                                                                                                                                                                                       | Phosphoethanolamine transfer to Kdo                                            |                               | PhoPQ, sRNA MgrR                           | Modest AMP resistance                         | 7,17       |
| EptC                      | Inner membrane       | Periplasmic          | <i>Campylobacter</i>                                                                                                                                                                                                                                                          | Phosphoethanolamine transfer to lipid A, flagellar rod, and other substituents | 4TN0                          | Present under normal laboratory conditions | TLR4 evasion, AMP resistance, motility        | 18,19      |
| FImF1                     | Inner membrane       | Periplasmic          | <i>Francisella</i>                                                                                                                                                                                                                                                            | Glucose, mannose addition to lipid A                                           |                               | Present under normal laboratory conditions | Possible role in AMP resistance               | 20         |
| FImF2                     | Inner membrane       | Periplasmic          | <i>Francisella</i>                                                                                                                                                                                                                                                            | Galactosamine addition to lipid A                                              |                               | Present under normal laboratory conditions | Possible role in AMP resistance               | 20,21      |
| FImK                      | Inner membrane       | Periplasmic          | <i>Francisella</i>                                                                                                                                                                                                                                                            | Glucose, mannose or galactosamine addition to lipid A                          |                               | Present under normal laboratory conditions | Possible role in AMP resistance, TLR4 evasion | 21         |
| KdkA                      | Inner membrane       | Cytoplasmic          | <i>Actinobacillus</i> ,<br><i>Bordetella</i> ,<br><i>Haemophilus</i> ,<br><i>Pasteurella</i> ,<br><i>Shewanella</i> , <i>Vibrio</i>                                                                                                                                           | Phosphorylation of Kdo                                                         |                               | Present under normal laboratory conditions | Possible effect on toxin delivery             | 7,22       |
| KdhA, KdhB (KdoH1, KdoH2) | Inner membrane       | Cytoplasmic          | <i>Francisella</i> ,<br><i>Helicobacter</i> ,<br><i>Legionella</i>                                                                                                                                                                                                            | Removal of outer Kdo                                                           |                               | Present under normal laboratory conditions | AMP Resistance                                | 23-25      |
| KdoO                      | Inner membrane       | Cytoplasmic          | <i>Burkholderia</i> ,<br><i>Yersinia</i>                                                                                                                                                                                                                                      | Hydroxylation of Kdo                                                           | 5YKA, 5YVZ, 6A2E, FYWO        | Present under normal laboratory conditions | Unknown                                       | 26         |

|      |                |               |                                                                                                         |                                                                     |                        |                                                                                |                                              |         |
|------|----------------|---------------|---------------------------------------------------------------------------------------------------------|---------------------------------------------------------------------|------------------------|--------------------------------------------------------------------------------|----------------------------------------------|---------|
| LmtA | Inner membrane | Cytoplasmic   | <i>Leptospira interrogans</i>                                                                           | Methylation of lipid A                                              |                        | Present under normal laboratory conditions                                     | Unknown                                      | 27      |
| LpxE | Inner membrane | Periplasmic   | <i>Capnocytophaga, Francisella, Helicobacter, Porphyromonas</i>                                         | 1-phosphatase                                                       |                        | Present under normal laboratory conditions                                     | AMP resistance, TLR4 evasion                 | 7,14    |
| LpxF | Inner membrane | Periplasmic   | <i>Capnocytophaga, Francisella, Helicobacter, Porphyromonas</i>                                         | 4'-phosphatase                                                      |                        | Present under normal laboratory conditions                                     | AMP resistance, TLR4 evasion                 | 7,14    |
| LpxO | Inner membrane | Cytoplasmic   | <i>Bordetella, Klebsiella, Legionella, Pseudomonas, Salmonella</i>                                      | Hydroxylation of lipid A acyl chains                                |                        | Fnr and ArcA (oxygen sensing)                                                  | Stress response coordination                 | 7,28    |
| LpxR | Outer membrane | Extracellular | <i>E. coli O157:H7, Helicobacter, Salmonella, Vibrio, Yersinia</i>                                      | 3'-O-deacylase                                                      | 3FID                   | sRNA MicF, Lrp in <i>E. coli O157:H7</i> , aminoarabinose lipid A modification | TLR4 evasion                                 | 7,29,30 |
| LpxT | Inner membrane | Periplasmic   | <i>E. coli, Pseudomonas, Salmonella, Yersinia</i>                                                       | Phosphorylation of lipid A, recycling of undecaprenyl pyrophosphate |                        | PmrAB, small peptide PmrR                                                      | Unknown                                      | 7,13,31 |
| PagL | Outer membrane | Extracellular | <i>Bordetella, Burkholderia, Pseudomonas, Salmonella</i>                                                | 3-O-deacylase                                                       | 2ERV                   | PhoPQ, aminoarabinose lipid A modification                                     | Lowered TLR4 activation                      | 5,7     |
| PagP | Outer membrane | Extracellular | <i>Bordetella, Erwinia, E.coli, Klebsiella, Legionella, Pseudomonas, Salmonella, Shigella, Yersinia</i> | Palmitate addition                                                  | 1MM4, 1MM5, 1THQ, 3GP6 | PhoPQ, membrane perturbation, RcsB (osmotic stress)                            | Selective AMP resistance, membrane integrity | 7,32-35 |

<sup>a</sup> Alternative enzyme names in certain species are given in parentheses.

<sup>b</sup> Organisms containing homologs of these enzymes were excluded from the table if the respective modification has not been observed. This table is likely to expand as the lipid A-core is further characterized from a variety of species.

## Supplementary Information S3. Regulatory mechanisms that affect LPS modifications

| Two component systems                |                                                                         |                                                                                                                          |                                        |            |
|--------------------------------------|-------------------------------------------------------------------------|--------------------------------------------------------------------------------------------------------------------------|----------------------------------------|------------|
| Response regulator/<br>Sensor kinase | Stimuli                                                                 | Modification enzymes regulated                                                                                           | Organisms                              | References |
| PhoP/Q                               | low Mg <sup>2+</sup> /Ca <sup>2+</sup> , AMPs, acidic pH, osmotic shock | Direct: PagL, PagP<br>Indirect: increased MgrR (see below)<br>Indirect: increased PmrD which binds PO <sub>4</sub> -PmrA | widespread                             | 36-43      |
| PmrA/B (BasR/S)                      | Fe <sup>3+</sup> , Al <sup>3+</sup> , acidic pH, vanadate               | ArnT, EptA, LpxT                                                                                                         | widespread                             | 44-47      |
| ArcA/B                               | Ubiquinone/Menaquinone redox states                                     | LpxO                                                                                                                     | <i>Salmonella</i>                      | 28         |
| ParR/S                               | AMPs                                                                    | ArnT                                                                                                                     | <i>Pseudomonas</i>                     | 48         |
| CprR/S                               | AMPs                                                                    | ArnT                                                                                                                     | <i>Pseudomonas</i>                     | 49         |
| ColR/S                               | Zn <sup>2+</sup>                                                        | EptA                                                                                                                     | <i>Pseudomonas</i>                     | 13         |
| CrrA/B                               | Unknown                                                                 | Indirect: increased CrrC that regulates PmrAB                                                                            | <i>Klebsiella</i>                      | 50,51      |
| VprA/B (CarR/S)                      | AMPs, bile, acidic pH                                                   | AlmG                                                                                                                     | <i>Vibrio</i>                          | 1,3        |
| Other transcriptional regulators     |                                                                         |                                                                                                                          |                                        |            |
| Regulator                            | Stimuli                                                                 | Modification enzymes regulated                                                                                           | Organisms                              | References |
| Fnr                                  | O <sub>2</sub>                                                          | LpxO                                                                                                                     | <i>Salmonella</i>                      | 28         |
| Lrp                                  | Butyrate                                                                | LpxR                                                                                                                     | EHEC                                   | 29         |
| RcsB                                 | Osmotic stress, independent of RcsC                                     | PagP                                                                                                                     | <i>E. coli</i>                         | 35         |
| Small RNA regulators                 |                                                                         |                                                                                                                          |                                        |            |
| Small RNA                            | Regulation of small RNA                                                 | Modification genes / mechanism of regulation                                                                             | Organisms                              | References |
| MicA                                 | Up regulated by $\sigma^E$                                              | <i>phoP</i> / inhibit translation                                                                                        | widespread                             | 52         |
| MicF                                 | Down regulated by Lrp stability by StpA and HU                          | <i>lpxR</i> / inhibit translation and decrease mRNA stability                                                            | widespread                             | 53         |
| MgrR                                 | Up regulated by PhoP                                                    | <i>eptB</i> / inhibit transcription                                                                                      | widespread                             | 39         |
| Post-translational regulation        |                                                                         |                                                                                                                          |                                        |            |
| Post-translational effector          | Mechanism of regulation                                                 | Modification enzyme regulated                                                                                            | Organisms                              | References |
| MgrB                                 | Feed back, deactivation of PhoQ                                         | Indirect: PagL, PagP, EptA, ArnT                                                                                         | widespread                             | 54         |
| PmrR (small peptide)                 | Inhibition of enzyme                                                    | LpxT                                                                                                                     | widespread                             | 45         |
| Disruption of OM asymmetry           | Activation of enzyme                                                    | PagP                                                                                                                     | widespread                             | 55         |
| Aminoarabinose-lipid A               | Prevents substrate recognition                                          | PagL, LpxR                                                                                                               | <i>Salmonella</i> ,<br><i>Yersinia</i> | 56,57      |

## References

- 1 Bilecen, K. *et al.* Polymyxin B resistance and biofilm formation in *Vibrio cholerae* are controlled by the response regulator CarR. *Infection and immunity* **83**, 1199-1209, doi:10.1128/iai.02700-14 (2015).
- 2 Hankins, J. V., Madsen, J. A., Giles, D. K., Brodbelt, J. S. & Trent, M. S. Amino acid addition to *Vibrio cholerae* LPS establishes a link between surface remodeling in gram-positive and gram-negative bacteria. *Proceedings of the National Academy of Sciences of the United States of America* **109**, 8722-8727, doi:10.1073/pnas.1201313109 (2012).
- 3 Herrera, C. M. *et al.* The *Vibrio cholerae* VprA-VprB two-component system controls virulence through endotoxin modification. *mBio* **5**, doi:10.1128/mBio.02283-14 (2014).
- 4 Llobet, E., Campos, M. A., Gimenez, P., Moranta, D. & Bengoechea, J. A. Analysis of the networks controlling the antimicrobial-peptide-dependent induction of *Klebsiella pneumoniae* virulence factors. *Infection and immunity* **79**, 3718-3732, doi:10.1128/iai.05226-11 (2011).
- 5 Madala, N. E., Leone, M. R., Molinaro, A. & Dubery, I. A. Deciphering the structural and biological properties of the lipid A moiety of lipopolysaccharides from *Burkholderia cepacia* strain ASP B 2D, in *Arabidopsis thaliana*. *Glycobiology* **21**, 184-194, doi:10.1093/glycob/cwq146 (2011).
- 6 McCoy, A. J., Liu, H., Falla, T. J. & Gunn, J. S. Identification of *Proteus mirabilis* mutants with increased sensitivity to antimicrobial peptides. *Antimicrobial agents and chemotherapy* **45**, 2030-2037, doi:10.1128/aac.45.7.2030-2037.2001 (2001).
- 7 Needham, B. D. & Trent, M. S. Fortifying the barrier: the impact of lipid A remodelling on bacterial pathogenesis. *Nature reviews. Microbiology* **11**, 467-481, doi:10.1038/nrmicro3047 (2013).
- 8 Rolin, O. *et al.* Enzymatic modification of lipid A by ArnT protects *Bordetella bronchiseptica* against cationic peptides and is required for transmission. *Infection and immunity* **82**, 491-499, doi:10.1128/iai.01260-12 (2014).
- 9 Trent, M. S., Ribeiro, A. A., Lin, S., Cotter, R. J. & Raetz, C. R. An inner membrane enzyme in *Salmonella* and *Escherichia coli* that transfers 4-amino-4-deoxy-L-arabinose to lipid A: induction on polymyxin-resistant mutants and role of a novel lipid-linked donor. *The Journal of biological chemistry* **276**, 43122-43131, doi:10.1074/jbc.M106961200 (2001).
- 10 Arroyo, L. A. *et al.* The pmrCAB operon mediates polymyxin resistance in *Acinetobacter baumannii* ATCC 17978 and clinical isolates through phosphoethanolamine modification of lipid A. *Antimicrobial agents and chemotherapy* **55**, 3743-3751, doi:10.1128/aac.00256-11 (2011).
- 11 Casabuono, A. C., van der Ploeg, C. A., Roge, A. D., Bruno, S. B. & Couto, A. S. Characterization of lipid A profiles from *Shigella flexneri* variant X lipopolysaccharide. *Rapid communications in mass spectrometry : RCM* **26**, 2011-2020, doi:10.1002/rcm.6306 (2012).
- 12 Liu, L., Li, Y., Wang, X. & Guo, W. A phosphoethanolamine transferase specific for the 4'-phosphate residue of *Cronobacter sakazakii* lipid A. *Journal of applied microbiology* **121**, 1444-1456, doi:10.1111/jam.13280 (2016).

- 13 Nowicki, E. M., O'Brien, J. P., Brodbelt, J. S. & Trent, M. S. Extracellular zinc induces phosphoethanolamine addition to *Pseudomonas aeruginosa* lipid A via the ColRS two-component system. *Molecular microbiology* **97**, 166-178, doi:10.1111/mmi.13018 (2015).
- 14 Renzi, F. *et al.* Modification of the 1-Phosphate Group during Biosynthesis of *Capnocytophaga canimorsus* Lipid A. *Infection and immunity* **84**, 550-561, doi:10.1128/iai.01006-15 (2016).
- 15 Simon, M. *et al.* Colistin- and carbapenem-resistant *Klebsiella oxytoca* harboring blaVIM-2 and an insertion in the mgrB gene isolated from blood culture. *International journal of medical microbiology : IJMM* **307**, 113-115, doi:10.1016/j.ijmm.2017.01.001 (2017).
- 16 Trombley, M. P. *et al.* Phosphoethanolamine Transferase LptA in *Haemophilus ducreyi* Modifies Lipid A and Contributes to Human Defensin Resistance In Vitro. *PloS one* **10**, e0124373, doi:10.1371/journal.pone.0124373 (2015).
- 17 Knirel, Y. A. *et al.* Cold temperature-induced modifications to the composition and structure of the lipopolysaccharide of *Yersinia pestis*. *Carbohydrate research* **340**, 1625-1630, doi:10.1016/j.carres.2005.04.007 (2005).
- 18 Cullen, T. W. *et al.* EptC of *Campylobacter jejuni* mediates phenotypes involved in host interactions and virulence. *Infection and immunity* **81**, 430-440, doi:10.1128/iai.01046-12 (2013).
- 19 Cullen, T. W. & Trent, M. S. A link between the assembly of flagella and lipooligosaccharide of the Gram-negative bacterium *Campylobacter jejuni*. *Proceedings of the National Academy of Sciences of the United States of America* **107**, 5160-5165, doi:10.1073/pnas.0913451107 (2010).
- 20 Song, F., Guan, Z. & Raetz, C. R. Biosynthesis of undecaprenyl phosphate-galactosamine and undecaprenyl phosphate-glucose in *Francisella novicida*. *Biochemistry* **48**, 1173-1182, doi:10.1021/bi802212t (2009).
- 21 Kanistanon, D. *et al.* A *Francisella* mutant in lipid A carbohydrate modification elicits protective immunity. *PLoS pathogens* **4**, e24, doi:10.1371/journal.ppat.0040024 (2008).
- 22 White, K. A., Lin, S., Cotter, R. J. & Raetz, C. R. A *Haemophilus influenzae* gene that encodes a membrane bound 3-deoxy-D-manno-octulosonic acid (Kdo) kinase. Possible involvement of kdo phosphorylation in bacterial virulence. *The Journal of biological chemistry* **274**, 31391-31400 (1999).
- 23 Chalabaev, S., Kim, T. H., Ross, R., Derian, A. & Kasper, D. L. 3-Deoxy-D-manno-octulosonic acid (Kdo) hydrolase identified in *Francisella tularensis*, *Helicobacter pylori*, and *Legionella pneumophila*. *The Journal of biological chemistry* **285**, 34330-34336, doi:10.1074/jbc.M110.166314 (2010).
- 24 Stead, C. M., Zhao, J., Raetz, C. R. & Trent, M. S. Removal of the outer Kdo from *Helicobacter pylori* lipopolysaccharide and its impact on the bacterial surface. *Molecular microbiology* **78**, 837-852, doi:10.1111/j.1365-2958.2010.07304.x (2010).
- 25 Zhao, J. & Raetz, C. R. A two-component Kdo hydrolase in the inner membrane of *Francisella novicida*. *Molecular microbiology* **78**, 820-836, doi:10.1111/j.1365-2958.2010.07305.x (2010).
- 26 Chung, H. S. & Raetz, C. R. Dioxygenases in *Burkholderia ambifaria* and *Yersinia pestis* that hydroxylate the outer Kdo unit of lipopolysaccharide. *Proceedings of the National*

- Academy of Sciences of the United States of America* **108**, 510-515, doi:10.1073/pnas.1016462108 (2011).
- 27 Boon Hinckley, M. *et al.* A *Leptospira interrogans* enzyme with similarity to yeast Ste14p that methylates the 1-phosphate group of lipid A. *The Journal of biological chemistry* **280**, 30214-30224, doi:10.1074/jbc.M506103200 (2005).
- 28 Fernandez, P. A. *et al.* Fnr and ArcA Regulate Lipid A Hydroxylation in *Salmonella* Enteritidis by Controlling lpxO Expression in Response to Oxygen Availability. *Frontiers in microbiology* **9**, 1220, doi:10.3389/fmicb.2018.01220 (2018).
- 29 Ogawa, R., Yen, H., Kawasaki, K. & Tobe, T. Activation of lpxR gene through enterohaemorrhagic *Escherichia coli* virulence regulators mediates lipid A modification to attenuate innate immune response. *Cellular microbiology* **20**, doi:10.1111/cmi.12806 (2018).
- 30 Reynolds, C. M. *et al.* An outer membrane enzyme encoded by *Salmonella typhimurium* lpxR that removes the 3'-acyloxyacyl moiety of lipid A. *The Journal of biological chemistry* **281**, 21974-21987, doi:10.1074/jbc.M603527200 (2006).
- 31 Herrera, C. M., Hankins, J. V. & Trent, M. S. Activation of PmrA inhibits LpxT-dependent phosphorylation of lipid A promoting resistance to antimicrobial peptides. *Molecular microbiology* **76**, 1444-1460, doi:10.1111/j.1365-2958.2010.07150.x (2010).
- 32 Bishop, R. E. *et al.* Transfer of palmitate from phospholipids to lipid A in outer membranes of gram-negative bacteria. *The EMBO journal* **19**, 5071-5080, doi:10.1093/emboj/19.19.5071 (2000).
- 33 Clements, A. *et al.* Secondary acylation of *Klebsiella pneumoniae* lipopolysaccharide contributes to sensitivity to antibacterial peptides. *The Journal of biological chemistry* **282**, 15569-15577, doi:10.1074/jbc.M701454200 (2007).
- 34 Fukuoka, S. *et al.* Physico-chemical and biophysical study of the interaction of hexa- and heptaacyl lipid A from *Erwinia carotovora* with magainin 2-derived antimicrobial peptides. *Biochimica et biophysica acta* **1778**, 2051-2057, doi:10.1016/j.bbamem.2008.03.022 (2008).
- 35 Szczesny, M., Beloin, C. & Ghigo, J. M. Increased Osmolarity in Biofilm Triggers RcsB-Dependent Lipid A Palmitoylation in *Escherichia coli*. *mBio* **9**, doi:10.1128/mBio.01415-18 (2018).
- 36 Garcia Vescovi, E., Soncini, F. C. & Groisman, E. A. Mg<sup>2+</sup> as an extracellular signal: environmental regulation of *Salmonella* virulence. *Cell* **84**, 165-174 (1996).
- 37 Gooderham, W. J. *et al.* The sensor kinase PhoQ mediates virulence in *Pseudomonas aeruginosa*. *Microbiology (Reading, England)* **155**, 699-711, doi:10.1099/mic.0.024554-0 (2009).
- 38 Kox, L. F., Wosten, M. M. & Groisman, E. A. A small protein that mediates the activation of a two-component system by another two-component system. *The EMBO journal* **19**, 1861-1872, doi:10.1093/emboj/19.8.1861 (2000).
- 39 Moon, K. & Gottesman, S. A PhoQ/P-regulated small RNA regulates sensitivity of *Escherichia coli* to antimicrobial peptides. *Molecular microbiology* **74**, 1314-1330, doi:10.1111/j.1365-2958.2009.06944.x (2009).

- 40 Prost, L. R. & Miller, S. I. The Salmonellae PhoQ sensor: mechanisms of detection of phagosome signals. *Cellular microbiology* **10**, 576-582, doi:10.1111/j.1462-5822.2007.01111.x (2008).
- 41 Richards, S. M., Strandberg, K. L., Conroy, M. & Gunn, J. S. Cationic antimicrobial peptides serve as activation signals for the Salmonella Typhimurium PhoPQ and PmrAB regulons in vitro and in vivo. *Frontiers in cellular and infection microbiology* **2**, 102, doi:10.3389/fcimb.2012.00102 (2012).
- 42 Rubin, E. J., Herrera, C. M., Crofts, A. A. & Trent, M. S. PmrD is required for modifications to escherichia coli endotoxin that promote antimicrobial resistance. *Antimicrobial agents and chemotherapy* **59**, 2051-2061, doi:10.1128/aac.05052-14 (2015).
- 43 Yuan, J., Jin, F., Glatter, T. & Sourjik, V. Osmosensing by the bacterial PhoQ/PhoP two-component system. *Proceedings of the National Academy of Sciences of the United States of America* **114**, E10792-e10798, doi:10.1073/pnas.1717272114 (2017).
- 44 Chen, H. D. & Groisman, E. A. The biology of the PmrA/PmrB two-component system: the major regulator of lipopolysaccharide modifications. *Annual review of microbiology* **67**, 83-112, doi:10.1146/annurev-micro-092412-155751 (2013).
- 45 Kato, A., Chen, H. D., Latifi, T. & Groisman, E. A. Reciprocal control between a bacterium's regulatory system and the modification status of its lipopolysaccharide. *Molecular cell* **47**, 897-908, doi:10.1016/j.molcel.2012.07.017 (2012).
- 46 Perez, J. C. & Groisman, E. A. Acid pH activation of the PmrA/PmrB two-component regulatory system of Salmonella enterica. *Molecular microbiology* **63**, 283-293, doi:10.1111/j.1365-2958.2006.05512.x (2007).
- 47 Wosten, M. M., Kox, L. F., Chamnongpol, S., Soncini, F. C. & Groisman, E. A. A signal transduction system that responds to extracellular iron. *Cell* **103**, 113-125 (2000).
- 48 Fernandez, L. *et al.* Adaptive resistance to the "last hope" antibiotics polymyxin B and colistin in Pseudomonas aeruginosa is mediated by the novel two-component regulatory system ParR-ParS. *Antimicrobial agents and chemotherapy* **54**, 3372-3382, doi:10.1128/aac.00242-10 (2010).
- 49 Fernandez, L. *et al.* The two-component system CprRS senses cationic peptides and triggers adaptive resistance in Pseudomonas aeruginosa independently of ParRS. *Antimicrobial agents and chemotherapy* **56**, 6212-6222, doi:10.1128/aac.01530-12 (2012).
- 50 Cheng, Y. H., Lin, T. L., Lin, Y. T. & Wang, J. T. Amino Acid Substitutions of CrrB Responsible for Resistance to Colistin through CrrC in Klebsiella pneumoniae. *Antimicrobial agents and chemotherapy* **60**, 3709-3716, doi:10.1128/aac.00009-16 (2016).
- 51 Wright, M. S. *et al.* Genomic and transcriptomic analyses of colistin-resistant clinical isolates of Klebsiella pneumoniae reveal multiple pathways of resistance. *Antimicrobial agents and chemotherapy* **59**, 536-543, doi:10.1128/aac.04037-14 (2015).
- 52 Coornaert, A. *et al.* MicA sRNA links the PhoP regulon to cell envelope stress. *Molecular microbiology* **76**, 467-479, doi:10.1111/j.1365-2958.2010.07115.x (2010).
- 53 Corcoran, C. P. *et al.* Superfolder GFP reporters validate diverse new mRNA targets of the classic porin regulator, MicF RNA. *Molecular microbiology* **84**, 428-445, doi:10.1111/j.1365-2958.2012.08031.x (2012).



- 54 Lippa, A. M. & Goulian, M. Feedback inhibition in the PhoQ/PhoP signaling system by a membrane peptide. *PLoS genetics* **5**, e1000788, doi:10.1371/journal.pgen.1000788 (2009).
- 55 Jia, W. *et al.* Lipid trafficking controls endotoxin acylation in outer membranes of *Escherichia coli*. *The Journal of biological chemistry* **279**, 44966-44975, doi:10.1074/jbc.M404963200 (2004).
- 56 Kawasaki, K., Ernst, R. K. & Miller, S. I. Inhibition of *Salmonella enterica* serovar Typhimurium lipopolysaccharide deacylation by aminoarabinose membrane modification. *Journal of bacteriology* **187**, 2448-2457, doi:10.1128/jb.187.7.2448-2457.2005 (2005).
- 57 Reines, M. *et al.* Deciphering the acylation pattern of *Yersinia enterocolitica* lipid A. *PLoS pathogens* **8**, e1002978, doi:10.1371/journal.ppat.1002978 (2012).
